# Supplementary material for: Modeling Impact of Land Use Dynamics on Hydrology and Sedimentation of Megech Dam Watershed, Ethiopia
Source: Hindawi journal article supplement (doi:10.1155/2020/6530278), 2020-10-24
Supplement: f1 [file 6530278.f1.pdf]

### Appendix 1: Mean Annual Rainfall of selected gauge stations

| Stations     | mean annual RF (mm) | class   |
|--------------|---------------------|---------|
| Aykel        | 1628                | class-1 |
| Gonder       | 1103                | class-1 |
| Amba giorgis | 976                 | class3  |
| Maksegnit    | 1096                | class-3 |
| Chewahit     | 1020                | class-4 |
| Gorgora      | 1085                | class-4 |

### Appendix 2: Selected Weather Stations and their Respective Locations

| Station            | latitude<br>( degree) | longitude<br>(degree) | Elevation a.s.l<br>(m) | X-Coordinate<br>(m) | Y-Coordinate<br>(m) |
|--------------------|-----------------------|-----------------------|------------------------|---------------------|---------------------|
| <b>Gorgora</b>     | 121500                | 371800                | 1830                   | 315087              | 1354781             |
| <b>Aykel</b>       | 123223                | 370331                | 2254                   | 289055              | 1387012             |
| <b>Ambagiorgis</b> | 124600                | 373600                | 2900                   | 348028              | 1411743             |
| <b>Chewahit</b>    | 122007                | 371342                | 1925                   | 307352              | 1364265             |
| <b>Gonder</b>      | 123116                | 372555                | 1973                   | 329618              | 1384684             |
| <b>Maksegnit</b>   | 122318                | 373318                | 1912                   | 342912              | 1369920             |

### Appendix 3: Values of Soil parameters used for the study area

| SNAM       | Haplic Nitisols |      |      |      | Chromic Luvisols |      |      |      |     |      |      |  |
|------------|-----------------|------|------|------|------------------|------|------|------|-----|------|------|--|
| NLAYERS    | 4               |      |      |      | 7                |      |      |      |     |      |      |  |
| HYDGRP     | C               |      |      |      | B                |      |      |      |     |      |      |  |
| SOL_ZMX    | 2000            |      |      |      | 1800             |      |      |      |     |      |      |  |
| ANION_EXCL | 0.01            |      |      |      | 0.01             |      |      |      |     |      |      |  |
| SOL_CRK    | 0.01            |      |      |      | 0.01             |      |      |      |     |      |      |  |
| TEXTURE    | SICL            | CL   | SC   | C    | SIL              | SIL  | SIL  | SILL | SIL | SIL  | SIL  |  |
| SOL_Z      | 200             | 900  | 1000 | 2000 | 200              | 260  | 460  | 650  | 950 | 1350 | 1800 |  |
| SOL_BD     | 1.1             | 1.27 | 1.28 | 1.22 | 1.45             | 1.46 | 1.45 | 1.49 | 1.5 | 1.49 | 1.47 |  |
| SOL_AWC    | 0.11            | 0.11 | 0.1  | 0.11 | 0.12             | 0.11 | 0.1  | 0.1  | 0.1 | 0.1  | 0.1  |  |
| SOL_K      | 4.34            | 4.54 | 5.16 | 4.24 | 7                | 37.2 | 34.8 | 33.6 | 36  | 36   | 36   |  |
| SOL_CBN    | 2               | 1.5  | 1.3  | 0.5  | 0.5              | 0.3  | 0.21 | 0.2  | 0.2 | 0.12 | 0.1  |  |
| CLAY       | 50              | 23   | 60   | 71   | 25               | 14   | 19   | 22   | 17  | 17   | 16   |  |
| SILT       | 33              | 50   | 25   | 20   | 31               | 66   | 59   | 56   | 57  | 57   | 59   |  |
| SAND       | 17              | 27   | 15   | 9    | 44               | 20   | 22   | 22   | 26  | 26   | 25   |  |
| ROCK       | 5               | 0    | 0    | 0.13 | 0.01             | 0    | 0    | 0    | 0   | 0    | 0    |  |
| SOL_ALB    | 0.13            | 0.13 | 0.13 | 0.22 | 0.13             | 0.13 | 0.13 | 0.13 | 0.1 | 0.13 | 0.13 |  |
| USLE_K     | 0.22            | 0.22 | 0.22 | 0.22 | 0.3              | 0.3  | 0.3  | 0.3  | 0.3 | 0.3  | 0.3  |  |

| <b>SNAM</b>    | <b>Eutric Leptosols</b> |            | <b>Urban</b> |             |            | <b>Eutric Vertisols</b> |           |            |            |            |            |          |
|----------------|-------------------------|------------|--------------|-------------|------------|-------------------------|-----------|------------|------------|------------|------------|----------|
| NLAYERS        | 2                       |            | 3            |             |            | 7                       |           |            |            |            |            |          |
| HYDGRP         | C                       |            | D            |             |            | D                       |           |            |            |            |            |          |
| SOL_ZMX        | 650                     |            | 1500         |             |            | 2422                    |           |            |            |            |            |          |
| ANION_EXCL     | 0.01                    |            | 0.01         |             |            | 0.01                    |           |            |            |            |            |          |
| SOL_CRK        | 0.01                    |            | 0.01         |             |            | 0.03                    |           |            |            |            |            |          |
| <b>TEXTURE</b> | <b>CL</b>               | <b>SCL</b> | <b>SIL</b>   | <b>SICL</b> | <b>SIC</b> | <b>CL</b>               | <b>CN</b> | <b>SIL</b> | <b>CNV</b> | <b>FSL</b> | <b>UWB</b> | <b>C</b> |
| SOL_Z          | 200                     | 650        | 280          | 737         | 1500       | 250                     | 363       | 847        | 1029       | 1392       | 1635       | 2422     |
| SOL_BD         | 1.1                     | 1.13       | 1.13         | 1.45        | 1.6        | 1.08                    | 1.27      | 1.28       | 1.22       | 1.13       | 1.1        | 1.1      |
| SOL_AWC        | 0.13                    | 0.1        | 0.22         | 0.11        | 0.16       | 0.12                    | 0.11      | 0.1        | 0.1        | 0.1        | 0.11       | 0.09     |
| SOL_K          | 25                      | 13         | 6.6          | 10.7        | 5.33       | 6.8                     | 4.54      | 5.16       | 4.24       | 4.34       | 4.24       | 4.04     |
| SOL_CBN        | 2                       | 1.1        | 1.49         | 1.02        | 0.15       | 1.6                     | 1.37      | 1.41       | 0.88       | 1.17       | 1.24       | 0.34     |
| CLAY           | 50                      | 66         | 26.5         | 37.5        | 45         | 53.6                    | 60.6      | 62.6       | 62.8       | 62.6       | 60         | 63.6     |
| SILT           | 34                      | 14         | 20           | 55          | 47.6       | 25.7                    | 18.6      | 17         | 8.4        | 9.4        | 12.7       | 16.6     |
| SAND           | 17                      | 20         | 23.5         | 7.47        | 7.37       | 20.7                    | 20.8      | 20.4       | 28.8       | 28         | 27.3       | 19.8     |
| ROCK           | 5                       | 0.01       | 1.09         | 0.08        | 0          | 0                       | 0         | 0          | 0          | 0          | 0          | 0        |
| SOL_ALB        | 0.13                    | 0.13       | 0.13         | 0.03        | 0.17       | 0.13                    | 0.09      | 0.09       | 0.09       | 0.09       | 0.09       | 0.09     |
| USLE_K         | 0.22                    | 0.22       | 0.32         | 0.49        | 0.49       | 0.23                    | 0.2       | 0.2        | 0.2        | 0.2        | 0.2        | 0.2      |

#### Appendices 4: Definition of Weather Generator statistical parameters

---

|                 |                                                                                       |
|-----------------|---------------------------------------------------------------------------------------|
| <b>tmpmx</b>    | Average or mean daily maximum air temperature for month (°C)                          |
| <b>tmpmn</b>    | Average or mean daily minimum air temperature for month (°C)                          |
| <b>tmpstdmx</b> | Standard deviation for daily maximum air temperature in month(°C)                     |
| <b>tmpstdmn</b> | Standard deviation for daily minimum air temperature in month(°C)                     |
| <b>pcpmm</b>    | Average or mean total monthly precipitation (mm H <sub>2</sub> O)                     |
| <b>pcpstd</b>   | Standard deviation for daily for daily precipitation in month(mmH <sub>2</sub> O/day) |
| <b>pcpskw</b>   | Skew coefficient for daily precipitation in month                                     |
| <b>pr_w(1)</b>  | Probability of a wet day following a dry day in month                                 |
| <b>pr_w(2)</b>  | Probability of a wet day following a wet day in month                                 |
| <b>pcpd</b>     | Average number of days of precipitation in month                                      |
| <b>solarav</b>  | Average daily solar radiation for month(MJ/m <sup>2</sup> /day)                       |
| <b>dewpt</b>    | Average daily dew point temperature in month(°C)                                      |
| <b>windav</b>   | Average daily wind speed in month(m/s)                                                |

---

**Appendix 5: Weather generator statistics and probability values of Gonder Station**

|                 | Jan   | Feb   | Mar   | Apr   | May   | Jun    | Jul    | Aug    | Sep    | Oct   | Nov   | Dec   |
|-----------------|-------|-------|-------|-------|-------|--------|--------|--------|--------|-------|-------|-------|
| <b>tmpmx</b>    | 28.21 | 29.83 | 30.28 | 30.38 | 29.17 | 25.70  | 23.15  | 23.36  | 25.45  | 26.78 | 27.53 | 27.71 |
| <b>tmpmn</b>    | 11.41 | 12.90 | 13.99 | 15.00 | 14.69 | 13.70  | 13.07  | 13.03  | 12.45  | 12.08 | 11.78 | 11.42 |
| <b>tmpstdmx</b> | 1.35  | 1.48  | 1.99  | 2.03  | 2.36  | 2.04   | 1.57   | 1.53   | 1.51   | 1.36  | 1.18  | 0.96  |
| <b>tmpstdmn</b> | 2.40  | 2.76  | 3.07  | 3.12  | 3.50  | 2.65   | 2.62   | 2.49   | 2.53   | 2.55  | 2.58  | 2.26  |
| <b>pcpmm</b>    | 3.65  | 3.11  | 14.18 | 31.67 | 88.26 | 191.86 | 329.81 | 318.89 | 116.46 | 88.16 | 21.21 | 8.50  |
| <b>pcpstd</b>   | 1.15  | 0.87  | 2.46  | 3.41  | 6.67  | 10.50  | 11.69  | 11.38  | 6.97   | 7.93  | 3.12  | 2.06  |
| <b>pcpskw</b>   | 12.59 | 10.78 | 11.74 | 5.77  | 3.87  | 3.02   | 2.10   | 2.02   | 2.84   | 4.45  | 6.82  | 11.57 |
| <b>pr_w(1)</b>  | 0.02  | 0.03  | 0.09  | 0.16  | 0.28  | 0.59   | 0.91   | 0.84   | 0.42   | 0.25  | 0.09  | 0.04  |
| <b>pr_w(2)</b>  | 0.25  | 0.20  | 0.31  | 0.49  | 0.58  | 0.73   | 0.92   | 0.90   | 0.59   | 0.46  | 0.36  | 0.32  |
| <b>pcpd</b>     | 0.76  | 0.95  | 3.52  | 6.86  | 12.33 | 20.43  | 28.38  | 27.71  | 15.71  | 10.14 | 3.81  | 1.62  |
| <b>solarav</b>  | 9.34  | 9.08  | 7.95  | 7.72  | 7.23  | 4.78   | 4.42   | 5.14   | 6.99   | 7.75  | 8.35  | 9.02  |
| <b>dewpt</b>    | 10.20 | 9.76  | 10.63 | 11.25 | 13.65 | 16.20  | 16.92  | 16.79  | 16.53  | 14.68 | 12.56 | 10.79 |
| <b>windav</b>   | 1.51  | 1.68  | 1.73  | 1.73  | 1.73  | 1.72   | 1.30   | 1.26   | 1.26   | 1.22  | 1.24  | 1.41  |
